# Supplementary material for: A structure-directing method to prepare semiconductive zeolitic cluster–organic frameworks with Cu3I4 building units
Source: Royal Society of Chemistry journal article supplement (doi:10.1039/c5cc02598b), 2015-01-01
Supplement: c5cc02598b1.pdf [file c5cc02598b1.pdf]

## Supporting Information for:

# Structure-Directing Method to Semiconductive Zeolitic Cluster-Organic Frameworks with $\text{Cu}_3\text{I}_4$ Building Units

Yao Kang, Wei-hui Fang, Lei Zhang,\* and Jian Zhang

State Key Laboratory of Structural Chemistry, Fujian Institute of Research on the Structure of Matter,  
Chinese Academy of Sciences, Fuzhou, Fujian 350002, China

Corresponding Author

\*E-mail: [LZhang@fjirsm.ac.cn](mailto:LZhang@fjirsm.ac.cn)

## Content

|                                                                                                                                                        |   |
|--------------------------------------------------------------------------------------------------------------------------------------------------------|---|
| <b>Experimental Section</b> .....                                                                                                                      | 2 |
| <b>Materials and physical measurements</b> .....                                                                                                       | 2 |
| <b>X-Ray data collection</b> .....                                                                                                                     | 2 |
| <b>Supporting Figures</b> .....                                                                                                                        | 2 |
| <b>Fig. S1</b> The simulated and experimental PXRD patterns of compounds <b>1</b> (left) and <b>2</b> (right). ....                                    | 2 |
| <b>Scheme S1</b> . Schematic drawing for CHA (left) and DACH (right) ligands in compounds <b>1</b> and <b>2</b> . ....                                 | 2 |
| <b>Fig. S2</b> The IR spectra of the two compounds. ....                                                                                               | 3 |
| <b>Fig. S3</b> The TGA curves of the two compounds. ....                                                                                               | 3 |
| <b>Fig. S4</b> The emission and excitation spectra of the two compounds.....                                                                           | 3 |
| <b>Fig. S5</b> Side view of the double-decker structure of compound <b>1</b> . ....                                                                    | 4 |
| <b>Fig. S6</b> The coordinate environment of the 4-membered (left) and twisted 8-membered rings (right).. ....                                         | 4 |
| <b>Fig. S7</b> Topological view of the 2D layers showing the 3-connected network in compound <b>1</b> . ....                                           | 4 |
| <b>Fig. S8</b> The side (left) and top (right) view of compound <b>1</b> . ....                                                                        | 4 |
| <b>Fig. S9</b> The comparison chains assembled by $\text{Cu}_3\text{I}_4$ clusters in ref. 23 (top) and complex <b>2</b> (down).....                   | 5 |
| <b>Fig. S10</b> The 1D hexagonal channel viewing down along the c and b axis direction. ....                                                           | 5 |
| <b>Fig. S11</b> The location of the $[\text{Cu}(\text{DACH})_2]^{2+}$ cations in the channel (left) and the rhomboid 6-membered circuits (right). .... | 5 |
| <b>Fig. S12</b> The comparison of 4-connected node in complex <b>2</b> (left) and in typical zeolites (right). ....                                    | 6 |
| <b>Fig. S13</b> Three types of unusual configuration windows in complex <b>2</b> . ....                                                                | 5 |
| <b>Fig. S14</b> The band gaps of the compound <b>1</b> (left) and complex <b>2</b> (right). ....                                                       | 6 |

## Experimental Section:

**Materials and physical measurements.** All chemicals and solvents were commercially purchased and used without further purification. IR spectra (KBr pellets) were recorded on an ABB Bomem MB102 spectrometer over a range 400-4000  $\text{cm}^{-1}$ . The thermogravimetric analyses (TGA) were performed on a Mettler Toledo TGA/SDTA 851<sup>e</sup> analyzer in air atmosphere with a heating rate of 10  $^{\circ}\text{C}/\text{min}$  from 30  $^{\circ}\text{C}$  to 1000  $^{\circ}\text{C}$ . Powder X-ray diffraction (PXRD) data were collected on a Rigaku Mini Flex II diffractometer using  $\text{CuK}\alpha$  radiation ( $\lambda = 1.54056\text{\AA}$ ) under ambient conditions. The solid state photoluminescence spectra were measured on the Cary Eclipse fluorescence spectrophotometer. The UV diffuse reflection data were recorded at room temperature using a powder sample with  $\text{BaSO}_4$  as a standard (100% reflectance) on a PerkinElmer Lamda-950 UV spectrophotometer and scanned at 200-800 nm.

**X-Ray data collection.** Crystallographic data of complexes **1** and **2** were collected on a Supernova single crystal diffractometer equipped with graphite-monochromatic  $\text{MoK}\alpha$  radiation ( $\lambda = 0.71073\text{\AA}$ ) at room temperature. The structure was solved with direct methods using SHELXS-97 and refined with the full-matrix least-squares technique based on  $F^2$  using the SHELXL-97. Non-hydrogen atoms were refined anisotropically, and all hydrogen atoms bond C were generated geometrically. Contributions to scattering due to disordered solvent molecules were removed using the *SQUEEZE* routine of *PLATON*.

## Supporting Figures:

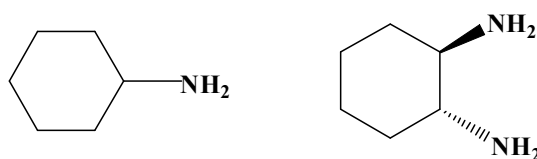

Scheme S1. Schematic drawing for CHA (left) and DACH (right) ligands in compounds **1** and **2**.

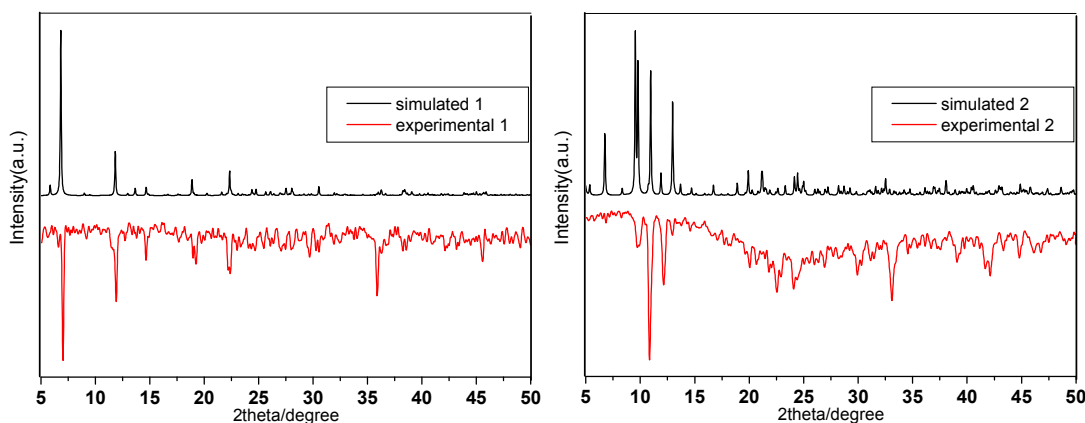

Fig. S1 The simulated and experimental PXRD patterns of compounds **1** (left) and **2** (right).

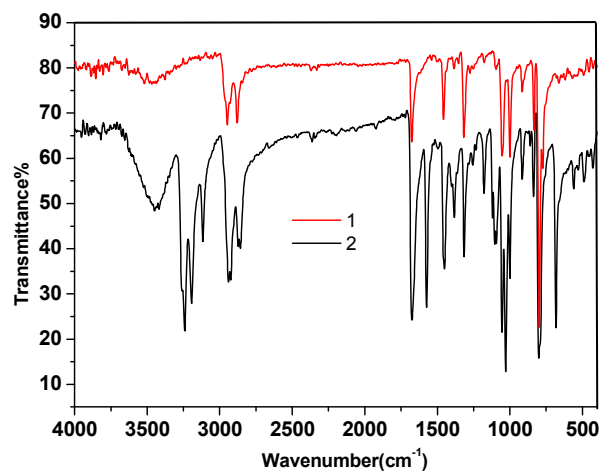

Fig. S2 The IR spectra of the two compounds.

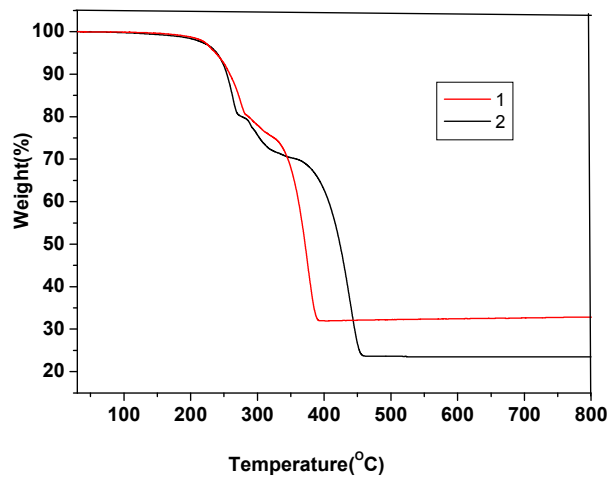

Fig. S3 The TGA curves of the two compounds, indicating that they can keep stable up to 200 °C.

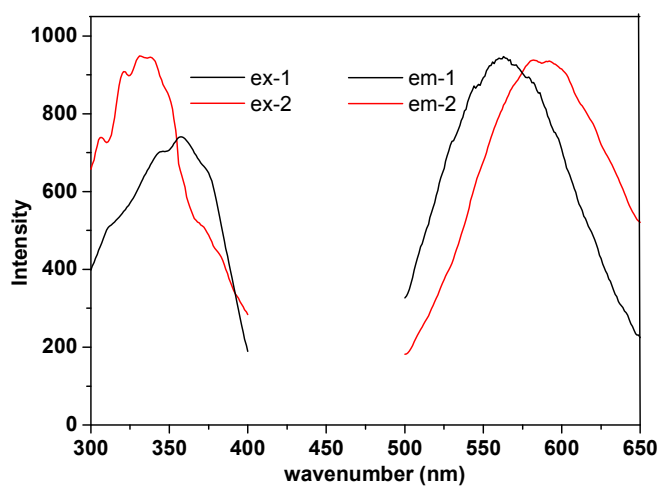

Fig. S4 The emission and excitation spectra of the two compounds.

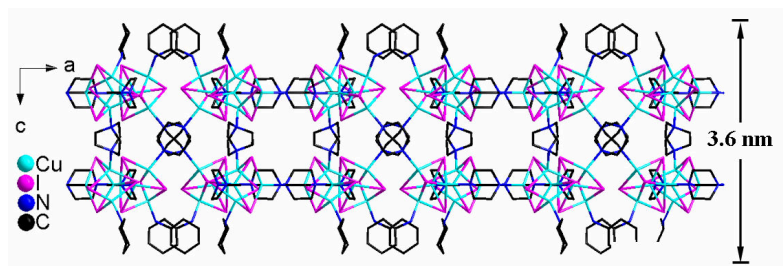

Fig. S5 Side view of the double-decker structure of compound 1.

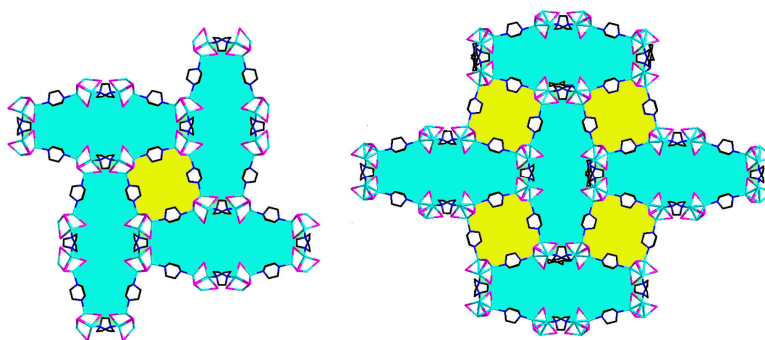

Fig. S6 The coordinate environment of the 4-membered (left) and twisted 8-membered rings (right). The terminal CHA ligands are omitted for clarity.

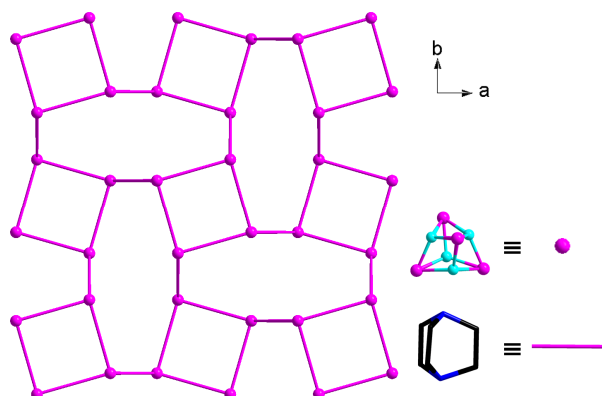

Fig. S7 Topological view of the 2D layers showing the 3-connected network in compound 1.

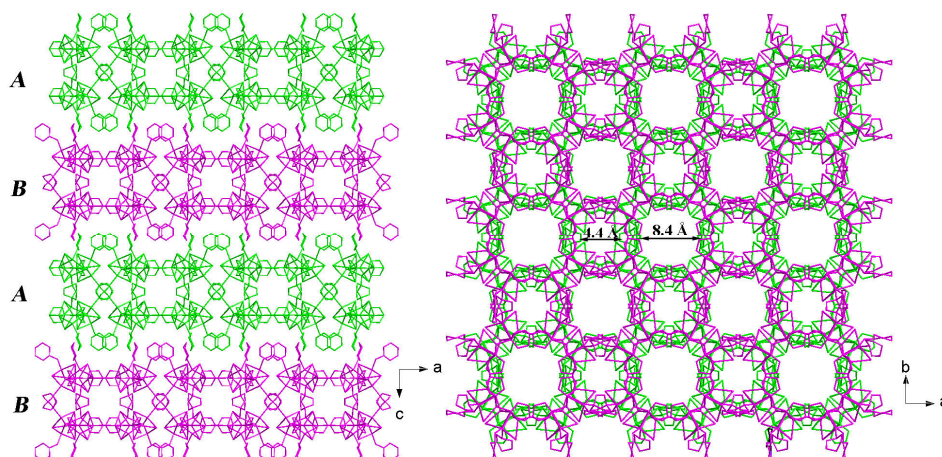

Fig. S8 The side (left) and top (right) view of the packing of compound 1.

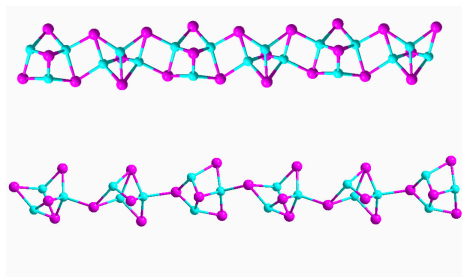

**Fig. S9** The comparison chains assembled by Cu<sub>3</sub>I<sub>4</sub> clusters in ref. 23 (top) and complex 2 (down).

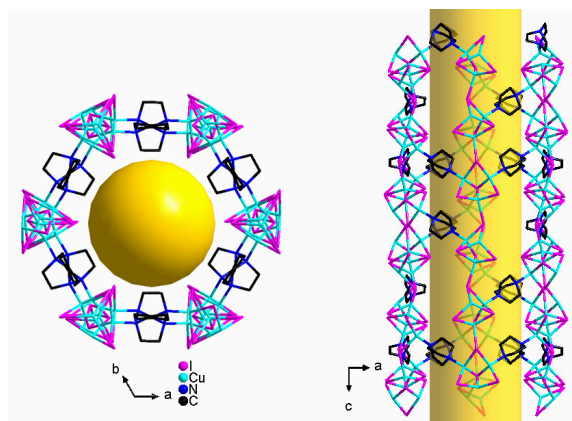

**Fig. S10** The 1D hexagonal channel viewing down along the *c* and *b* axis direction.

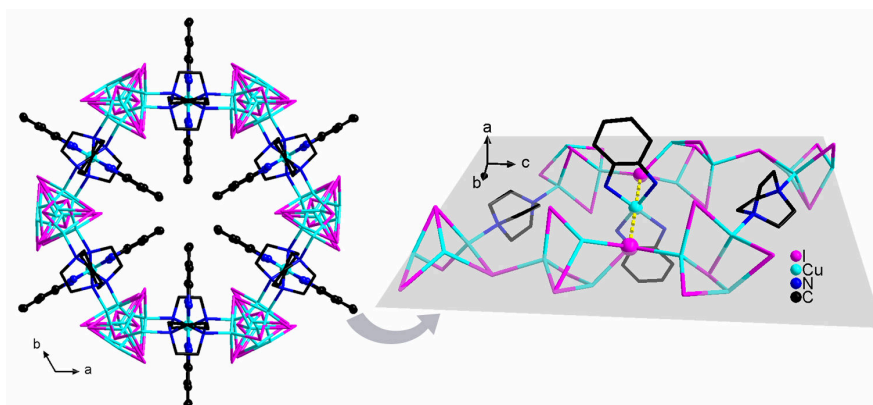

**Fig. S11** The location of the [Cu(DACH)<sub>2</sub>]<sup>2+</sup> cations in the channel (left) and the rhomboid 6-membered circuits (right).

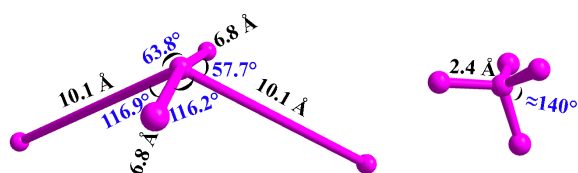

**Fig. S12** The comparison of 4-connected node in complex 2 (left) and in typical zeolites (right).

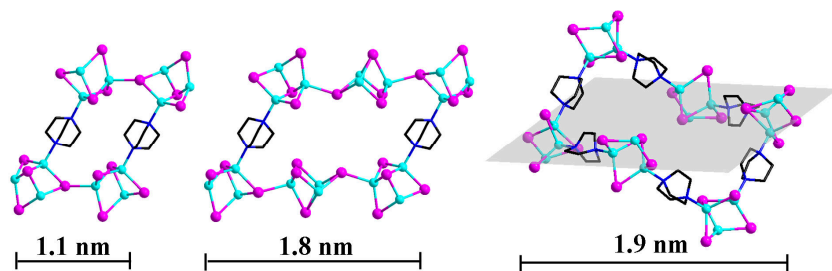

**Fig. S13** Three types of unusual configuration windows in complex 2.

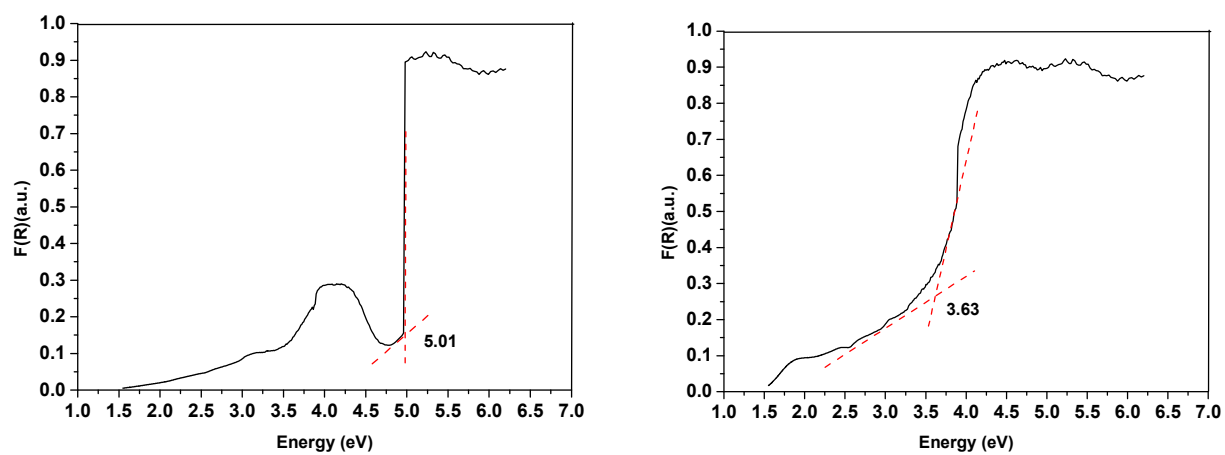

**Fig. S14** The bands gap of the compound 1 (left) and complex 2 (right).
